# Supplementary material for: Physiological and Molecular Responses of Vitis vinifera cv. Tempranillo Affected by Esca Disease
Source: MDPI journal article supplement (doi:10.3390/antiox11091720), 2022-08-30
Supplement: s1 [file s1]

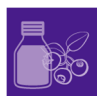

## SUPPLEMENTARY MATERIAL

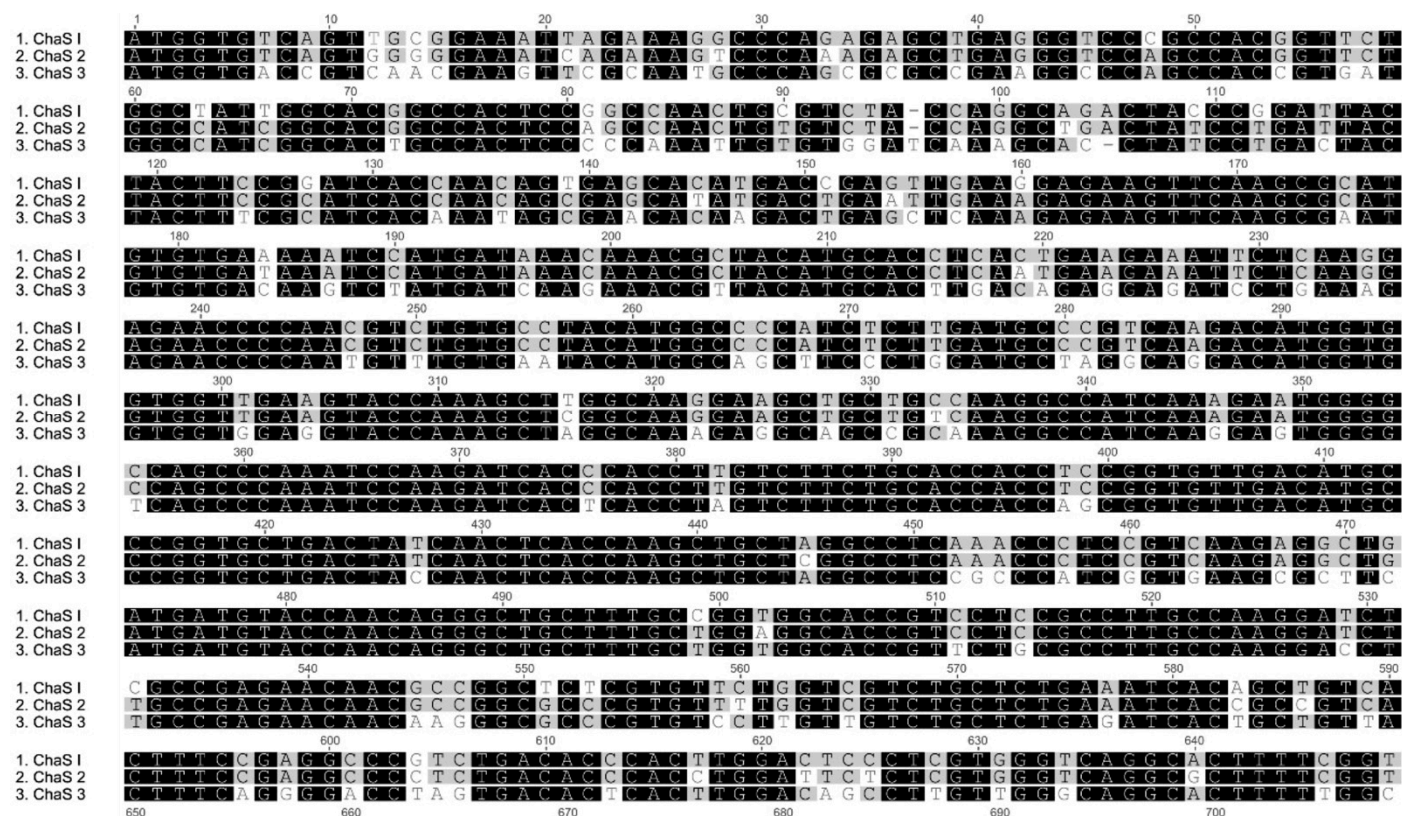Figure S1. Nucleotide sequence alignment of the coding sequence of *ChaSI*, *ChaS2* and *ChaS3*.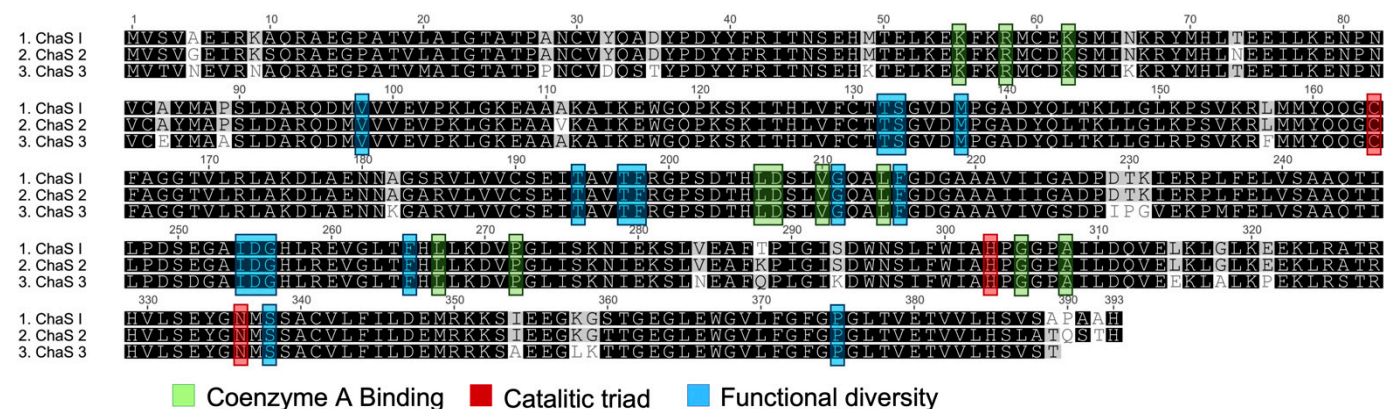Figure S2. Alignment of the amino acid sequence of *ChaSI*, *ChaS2* and *ChaS3*.

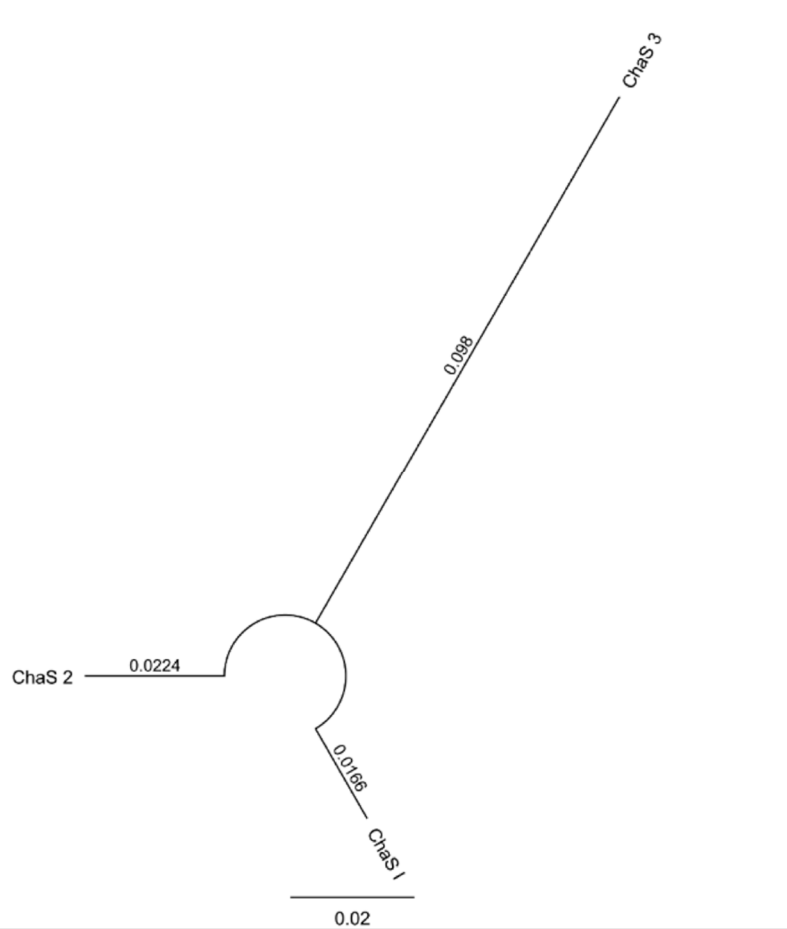

**Figure S3.** Phylogenetic tree from the amino acid sequence of ChaS1, ChaS2 and ChaS3.
